# Supplementary material for: NIR luminescence for the detection of latent fingerprints based on ESIPT and AIE processes
Source: Royal Society of Chemistry journal article supplement (doi:10.1039/c5ra16614d), 2015-01-01
Supplement: c5ra16614d1.pdf [file c5ra16614d1.pdf]

## Supporting Information

for

### **NIR Luminescence for the Detection of Latent Fingerprints Based on ESIPT and AIE Processes†**

Xiaodong Jin,<sup>a</sup> Libo Dong,<sup>b</sup> Xiaoyu Di,<sup>a</sup> Hai Huang,<sup>a</sup> Jingning Liu,<sup>b</sup> Xiaoli Sun,<sup>c</sup> Xueqiong Zhang,<sup>a</sup> and Hongjun Zhu\*<sup>a</sup>

*a* Department of Applied Chemistry, Nanjing Tech University, Nanjing, Jiangsu, 211816, P. R. China. E-mail: [zhuhj@njtech.edu.cn](mailto:zhuhj@njtech.edu.cn)

*b* Department of Criminal Science and Technology, Jiangsu Police Institute, Nanjing, Jiangsu, 210031, P. R. China.

*c* Jiangsu Key Laboratory for Molecular and Medical Biotechnology, Nanjing Normal University, Nanjing, Jiangsu, 210032, P. R. China.

#### **Materials and instrumentation**

All chemicals used in this paper were obtained from commercial suppliers, and used as received without further purification. Thin layer chromatography was performed on EM Science silica gel 60 F<sub>254</sub> plates (250 μm). Visualization of the developed chromatogram was accomplished by UV lamp.

<sup>1</sup>H NMR, and <sup>13</sup>C NMR spectra were measured on a Bruker AV-400 spectrometer with chemical shifts reported in ppm (in CDCl<sub>3</sub>, TMS as internal standard). All fluorescence measurements were recorded on a Varian Cary Eclipse Fluorescence Spectrophotometer.

#### **Synthesis and preparation of the novel latent-fingerprint sensor NIR-LP**

*The synthesis of 4-dimethylamino-2'-hydroxychalcone (NIR-LP).* To a solution of 4-dimethylbenzaldehyde (12 mmol, 1.79 g) and 2'-hydroxyacetophenone (13.2 mmol, 1.80 g) in EtOH (30 mL), KOH (50 mmol, 2.8 g) in water was added and stirred at room temperature for 24 h. The reaction mixture was neutralized with dilute HCl until the pH value was adjusted to 7.0. The precipitates were collected through filtration and washed with ethanol three times. The obtained residue was further purified by recrystallization using ethanol to afford the desired

product (700 mg, 2.62 mmol) as deep red crystals.  $^1\text{H}$  NMR (400 MHz,  $\text{CDCl}_3$ ):  $\delta$  (TMS, ppm) 13.20 (s, 1H), 7.93–7.90 (t, 2H), 7.57 (d,  $J=8$  Hz, 2H), 7.47–7.43 (t, 2H), 7.00 (d,  $J=8$  Hz, 1H), 6.92 (t,  $J=8$  Hz, 1H), 6.69 (d,  $J=8$  Hz, 2H), 3.05 (s, 6H).  $^{13}\text{C}$  NMR (100 MHz,  $\text{CDCl}_3$ ):  $\delta$  (TMS, ppm) 193.5, 163.5, 152.3, 146.5, 135.6, 130.8, 129.4, 122.3, 120.4, 118.6, 118.4, 114.2, 111.8, 40.1.

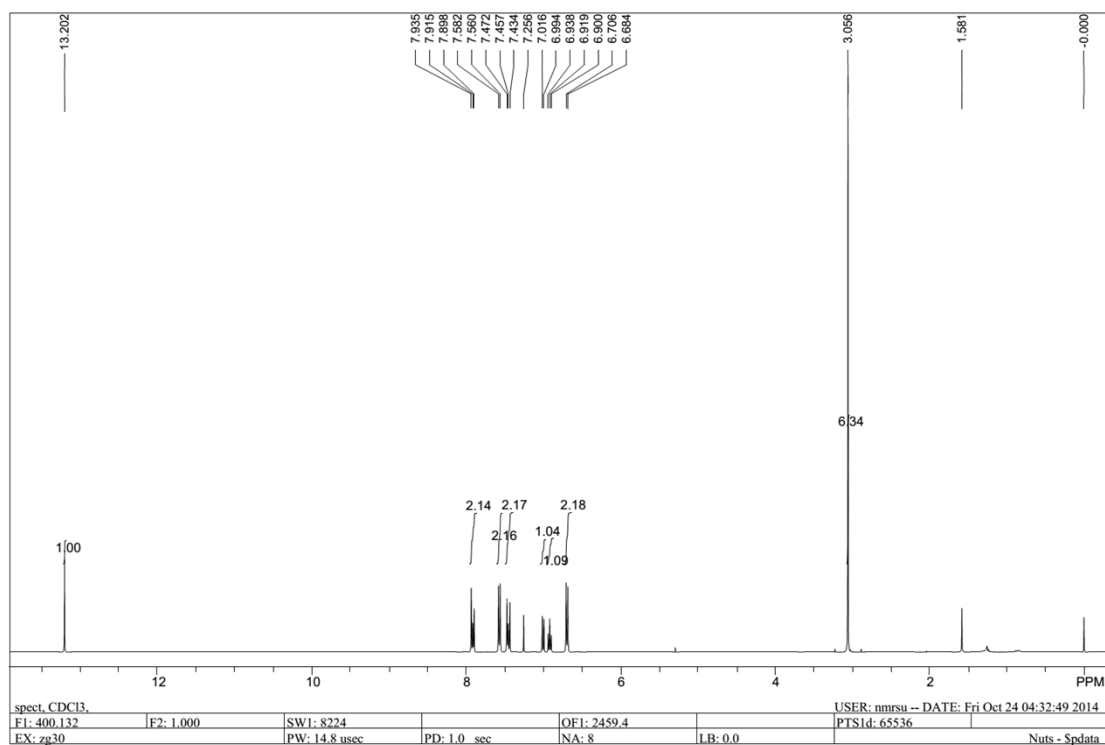

**Fig. S1**  $^1\text{H}$  NMR of NIR-LP

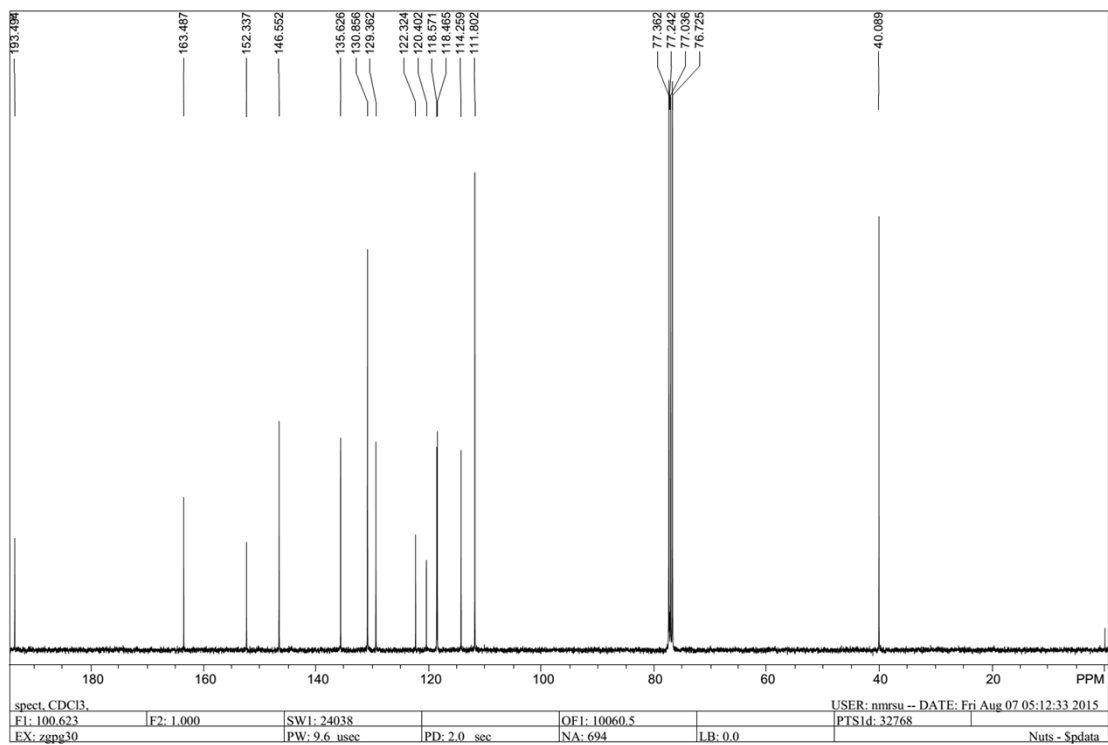

**Fig. S2**  $^{13}\text{C}$  NMR of NIR-LP

Table S1 Summary of the methods for the latent fingerprint detection/identification

| No | Imaging moiety                                                                      | LFP origin | $\lambda_{ex}/\lambda_{em}$ | Incubation time | Ref       |
|----|-------------------------------------------------------------------------------------|------------|-----------------------------|-----------------|-----------|
| 1  | 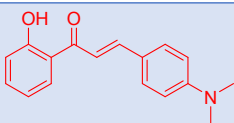   | sebaceous  | 430 nm/650 nm               | 20 min          | This work |
| 2  |    | sebaceous  | 365 nm/450-480 nm           | 5 min           | [S1]      |
| 3  |    | sebaceous  | 365 nm/460-480 nm           | 5 min           | [S2]      |
| 4  |   | sebaceous  | 365 nm/460-480 nm           | 5 min           |           |
| 5  | Antibody functionalized magnetic NPs                                                | Not clear  | ~                           | 30 min          | [S3]      |
| 6  | UCNPs-LBA                                                                           | cocaine    | 980 nm/520 nm               | 30 min          | [S4]      |
| 7  |  | Not clear  | 475 nm/690 nm               | 5 h             | [S5]      |
| 8  |  | sebaceous  | 443 nm/552 nm <sup>a</sup>  | 5 min           | [S6]      |
| 9  | MPA-capped ZnxCd1-xSe QDs                                                           | sebaceous  | ~                           | 30 min          | [S7]      |

Note: <sup>a</sup> The probe-fingerprint complex have a strong fluorescent emission at 552 nm and the probe powder have a strong fluorescent emission at 602 nm.

[S1] Li, Y.; Xu, L.; Su, B. Chem. Commun 2012, 48, 4109-4111.

[S2] Xu, L.; Li, Y.; Li, S.; Hu, R.; Qin, A.; Tang, B. Z.; Su, B. Analyst 2014, 139, 2332-2335.

[S3] Hazarika, P.; Jickells, S. M.; Wolff, K.; Russell, D. A. Anal. Chem. 2010, 82, 9150-9154.

[S4] Wang, J.; Wei, T.; Li, X.; Zhang, B.; Wang, J.; Hua. Angew. Chem. Int. Ed. 2014, 53, 1616-1620.

[S5] Wang, K.; Yang, Z.; Li, X. Chemistry - A European Journal 2015, 21, 5680-5684.

[S6] Wang, F.; Chen, J.; Zhou, H.; Li, W.; Zhang, Q.; Yu, C. Analytical Methods 2014, 6, 654-657.

[S7] Yu, X. J.; Zuo, S. L.; Xiong, H.; Yu, Y. C.; Liu, J. J.; Yang, R. Q. ChemPlusChem 2013, 78, 244-249.
